# Supplementary material for: The CDK4/6 Inhibitor Palbociclib Inhibits Estrogen-Positive and Triple Negative Breast Cancer Bone Metastasis In Vivo
Source: MDPI journal article supplement (doi:10.3390/cancers15082211), 2023-04-08
Supplement: s1 [file s1]

## The CDK4/6 Inhibitor Palbociclib Inhibits Estrogen-Positive and Triple Negative Breast Cancer Bone Metastasis In Vivo

Lubaid Saleh, Penelope D. Ottewell, Janet E. Brown, Steve L. Wood, Nichola J. Brown, Caroline Wilson, Catherine Park, Simak Ali and Ingunn Holen

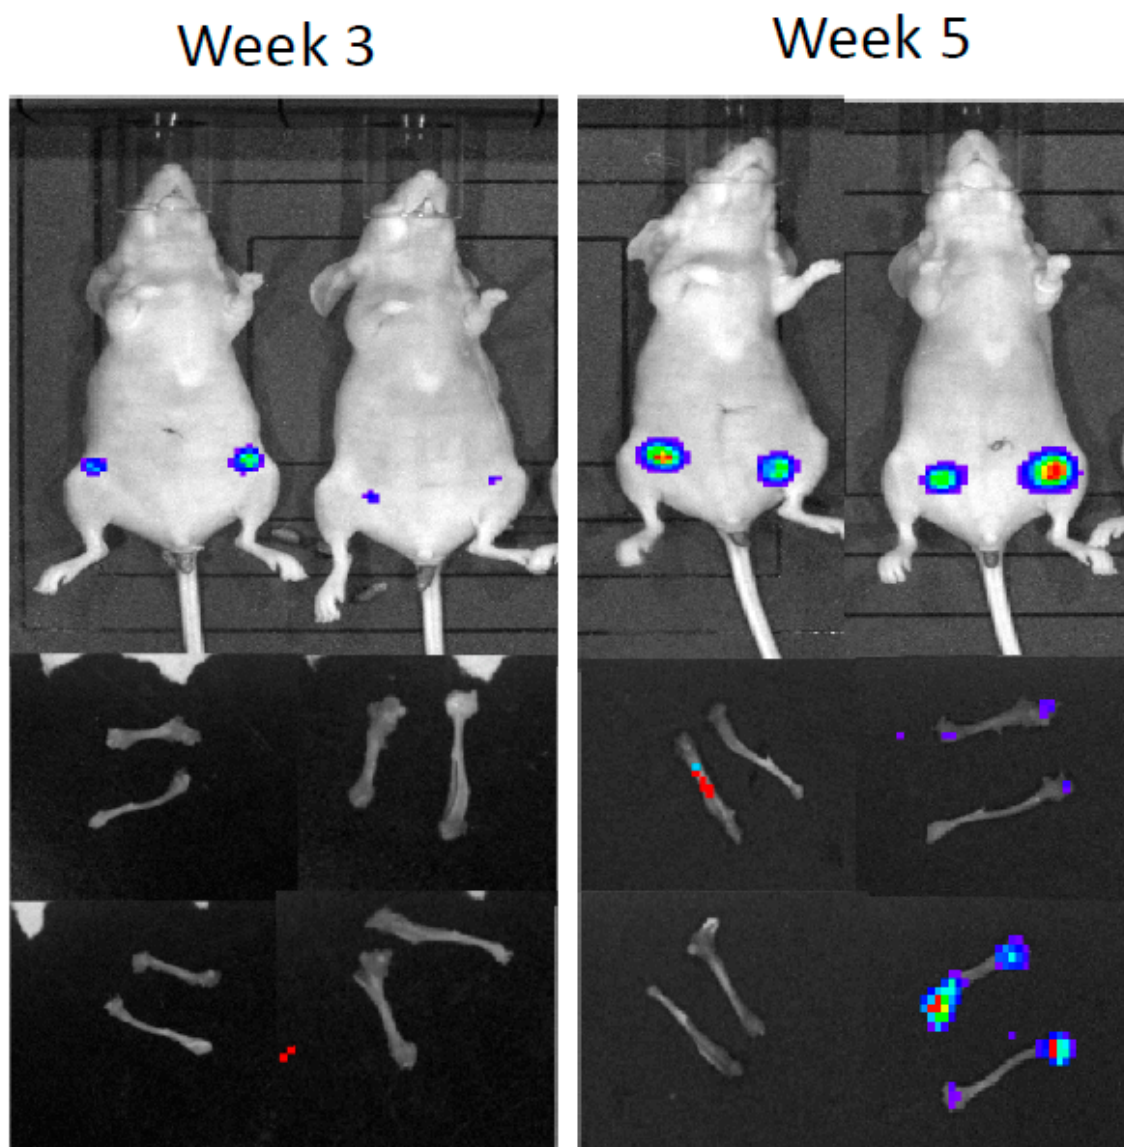

**Supplementary Figure S1.** Representative images of tumour cell dissemination to the bone 3 and 5 weeks after mammary fat pad injection of T47DLuc2+GFP+ cells.

A

### Palbociclib IC<sub>50</sub>

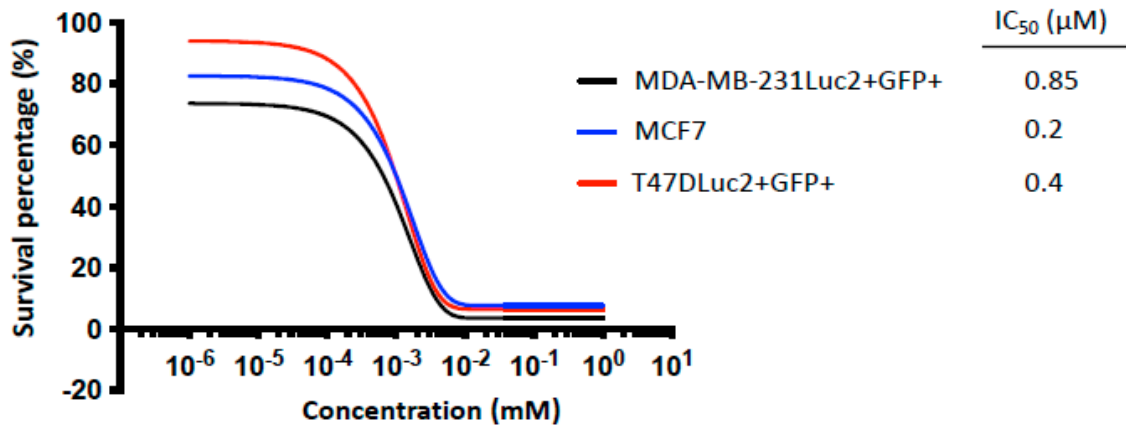

B

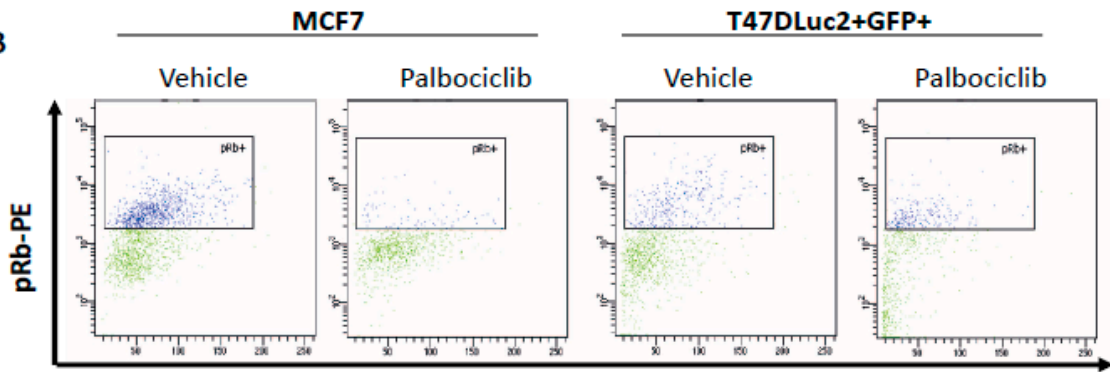

C

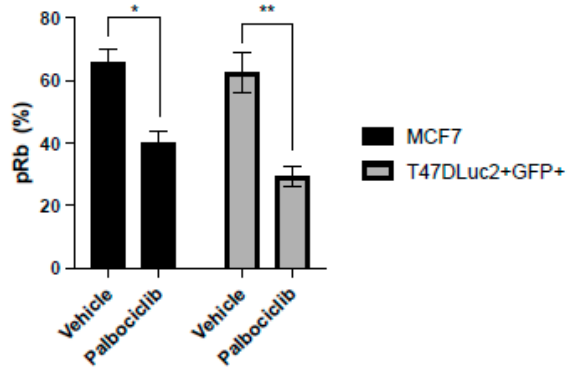

**Supplementary Figure S2.** (A) Dose response curves in the ER+ve, MCF7 and T47DLuc2+GFP+ cell lines. (B,C) Representative plots of flow cytometry analysis of pRb protein (mean  $\pm$  SEM,  $n = 3$ , \*\*  $p < 0.05$ ;  $t$ -test).

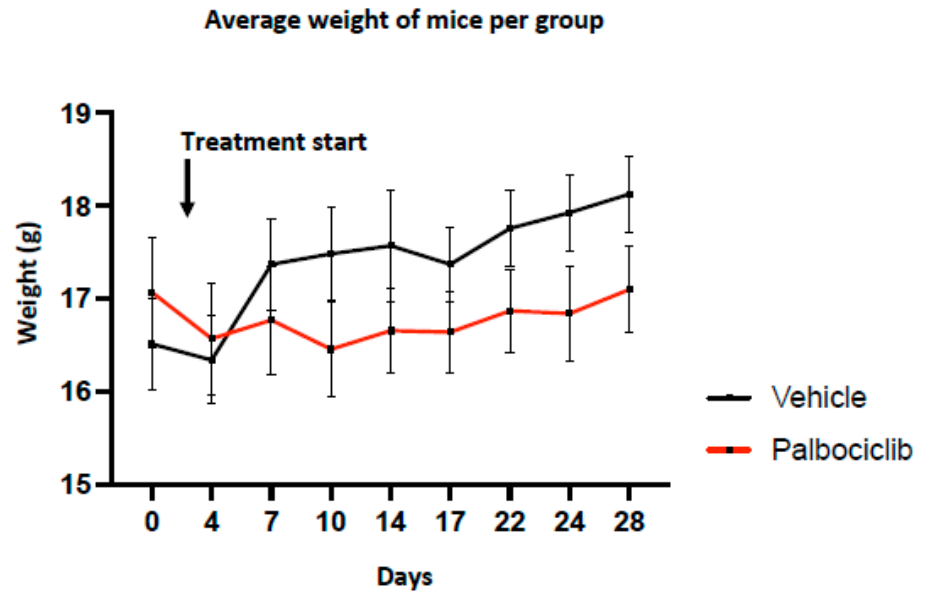

**Supplementary Figure S3.** Average body weights of mice treated with 100  $\mu$ l vehicle (Na lactate) or 100  $\mu$ l palbociclib (100 mg/kg).

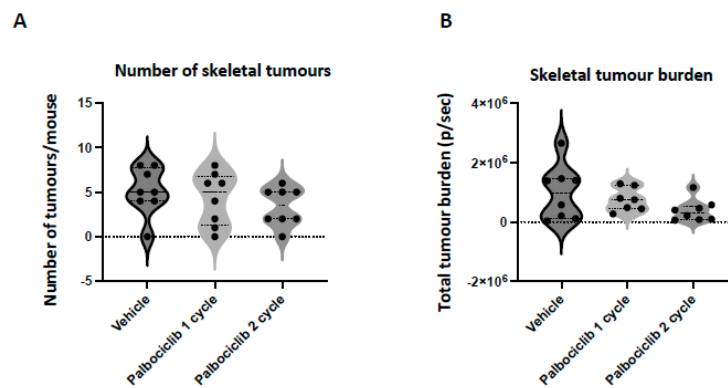

**Scheme 4.** (A) The number of skeletal tumours and corresponding (B) skeletal tumour burden 2 weeks after intracardiac injection of MDA-MB-231Luc2+GFP+ cells.

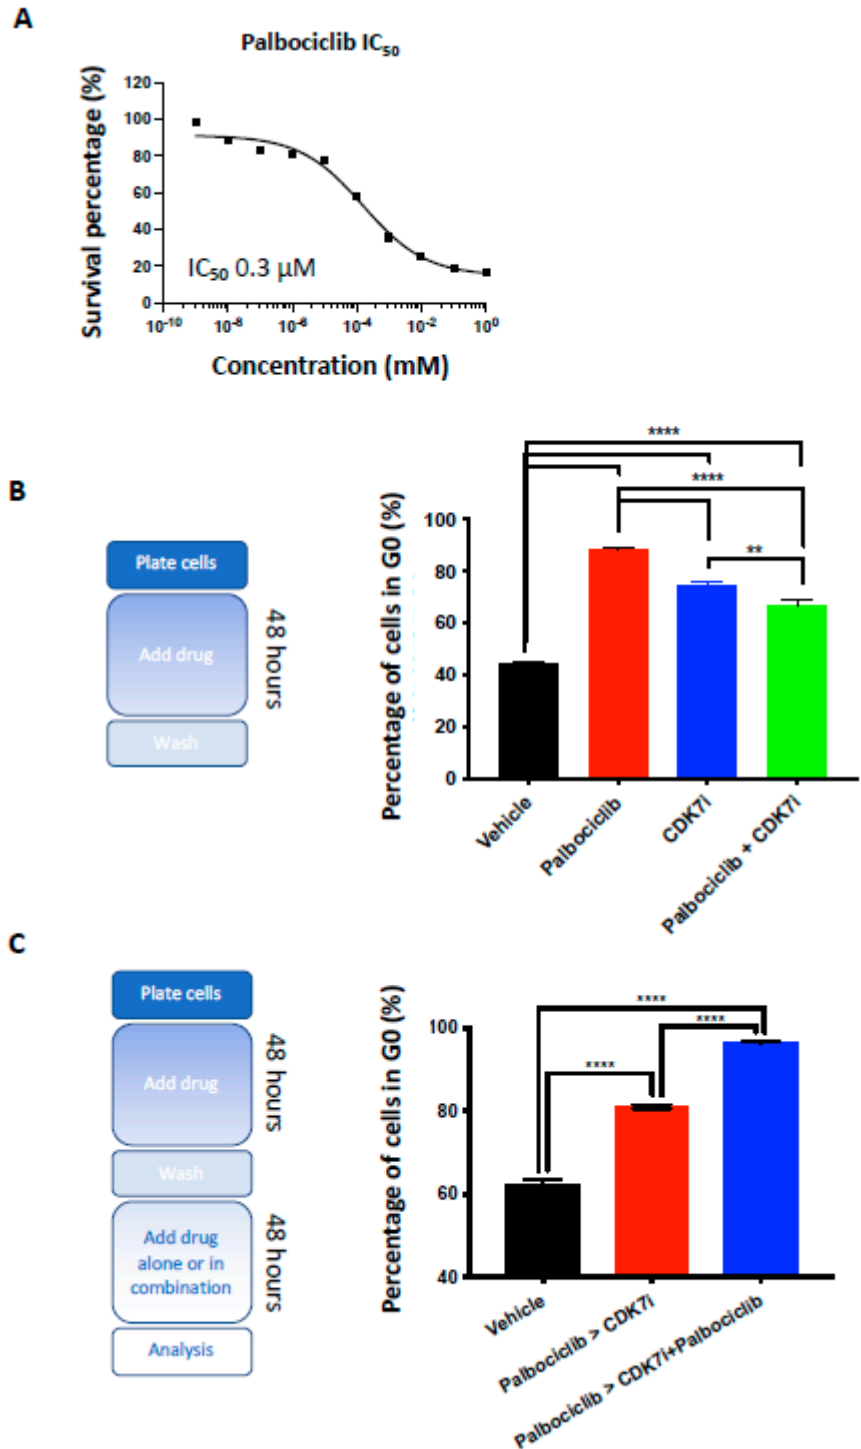

**Supplementary Figure S5.** (A) The dose response curve and the calculated  $IC_{50}$  of CDK7i on the MDA-MB-231Luc2+GFP+ cell line. (B) A total of  $4 \times 10^4$  MDA-MB-231Luc2+GFP+ cells were treated with drug and incubated for 48 h. Cell cycle analysis was conducted after 48 h exposure time point using PI staining and flow cytometry (mean  $\pm$  SEM compared to vehicle,  $n = 3$ , \*\*  $p < 0.005$ , \*\*\*\*  $p < 0.0005$ ;  $t$ -test). (C) A total of  $4 \times 10^4$  MDA-MB-231 cells were treated with palbociclib and incubated for 48 h. Cells were then washed and treated with either CDK7i or CDK7i + palbociclib for a further 48 h. At this point, flow cytometry analysis of the cell cycle was conducted by PI staining (mean  $\pm$  SEM compared to vehicle,  $n = 3$ , \*\*\*\*  $p < 0.0005$ ;  $t$ -test). Concentrations of palbociclib and CDK7i were 0.4  $\mu$ M and 0.33  $\mu$ M, respectively.

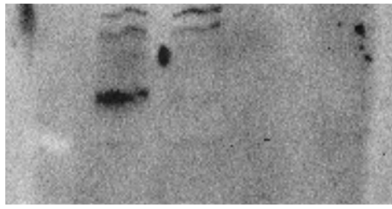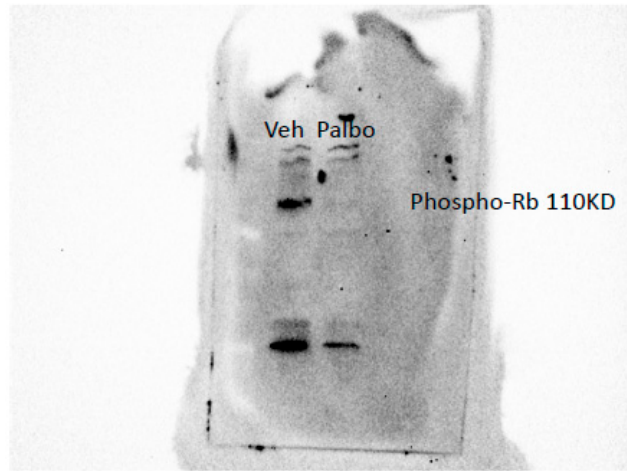

pRb

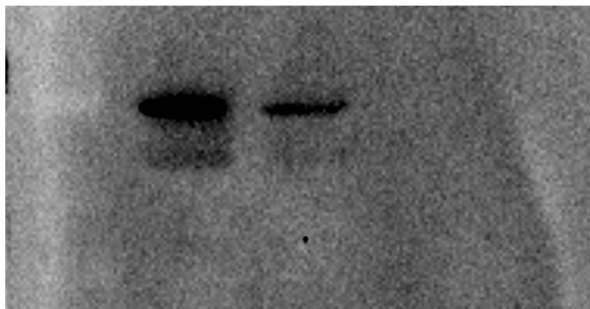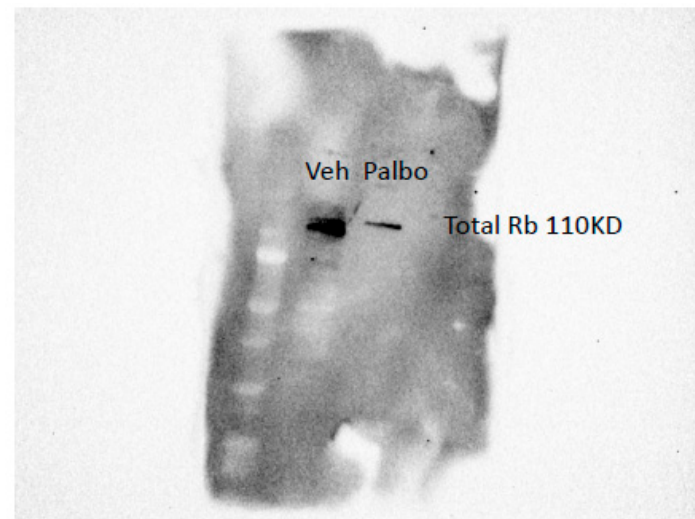

total Rb

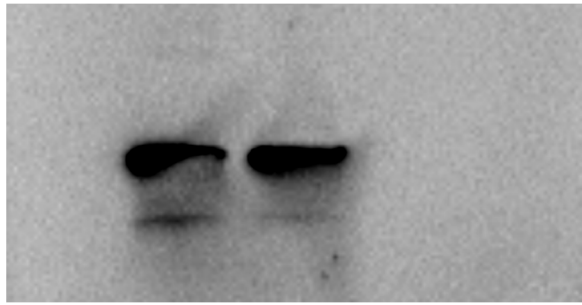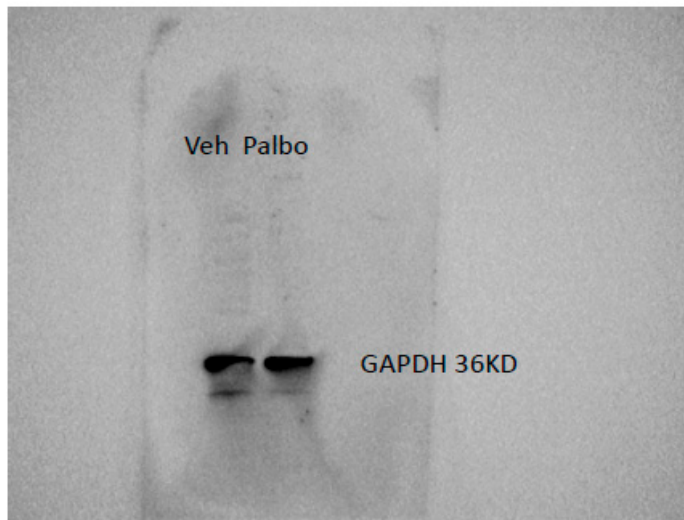

GAPDH

| GAPDH_Merged_UOS 2023-02-23_11h11m03s+UOS 2023-02-22_12h08m07s_Exposure_120.0sec |      |          |            |                |                |                   |              |             |             |          |          |
|----------------------------------------------------------------------------------|------|----------|------------|----------------|----------------|-------------------|--------------|-------------|-------------|----------|----------|
|                                                                                  | Lane | Band No. | Band Label | Mol. Wt. (KDa) | Relative Front | Adj. Volume (Int) | Volume (Int) | Abs. Quant. | Rel. Quant. | Band %   | Lane %   |
| V_pRb                                                                            | 1    | 1        |            | N/A            | 0.317308       | 11025648          | 37760832     | N/A         | N/A         | 35.87999 | 22.95828 |
| V_GAPDH                                                                          | 1    | 2        |            | N/A            | 0.730769       | 11932272          | 33449076     | N/A         | N/A         | 38.83035 | 24.8461  |
| V_Rb                                                                             | 1    | 3        |            | N/A            | 0.822115       | 7771320           | 25168428     | N/A         | N/A         | 25.28966 | 16.18192 |
| P_pRb                                                                            | 2    | 1        |            | N/A            | 0.322115       | 2829791           | 17963789     | N/A         | N/A         | 14.87344 | 7.003948 |
| P_GAPDH                                                                          | 2    | 2        |            | N/A            | 0.735577       | 11484319          | 30745771     | N/A         | N/A         | 60.36183 | 28.42456 |
| P_Rb                                                                             | 2    | 3        |            | N/A            | 0.826923       | 4711688           | 13654505     | N/A         | N/A         | 24.76473 | 11.66179 |

Supplementary Figure S6. Original Western blot of Figure 1B.
